# Supplementary material for: Observational study of HPV genitalia and oral infection in an unvaccinated population of men who have sex with men infected with HIV in Northwest Spain
Source: medRxiv preprint, doi:10.1101/2021.08.09.21261786, version 1 (2021-08-09)
Supplement: Questionnaire [file 261786_file02.docx]

**Supplementary material**
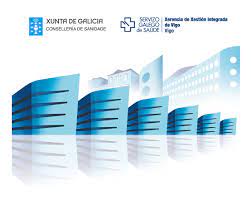
 **1**

Sexual behaviour questionnaire (*translated from original in Spanish*)

**HPV study 217/2019**

Subject ID:

Date of visit:

Sexual role: Active Pasive Versatile

Age of first sexual intercourse: (years)

Number of lifetime sexual partners:

Number of sexual partners last year:

Do you currently have a stable sexual partner? Yes No

Do you usually use condom during sexual intercourse? Yes No

Do you usually use condom during oral sex? Yes No

Are you circumcised? Yes No
